# Supplementary material
Source: PubMed Central journal article supplement (PMC8485212)

## Supplemental Online Content

Künzel SH, Lindner M, Sassen J, et al. Association of reading performance in geographic atrophy secondary to age-related macular degeneration with visual function and structural biomarkers. *JAMA Ophthalmol*. Published online September 30, 2021. doi:10.1001/jamaophthalmol.2021.3826

**eFigure 1.** Correlation among candidate features

**eFigure 2.** Backward-selected Linear Model: Feature Importance at Baseline

**eFigure 3.** Backward-selected LM: Longitudinal Feature Importance

**eFigure 4.** Model accuracy

**eTable 1.** Cohort characteristics

**eTable 2.** Determinants reading performance (univariable cross-sectional analysis)

This supplemental material has been provided by the authors to give readers additional information about their work.

**eTable 1. Cohort characteristics**

The table lists the structural biomarkers of the cross-sectional cohort and the baseline characteristics of the longitudinal cohort with their median value [interquartile range (IQR)] or their standard deviation ( $\pm$ SD). Variables were assessed for normality using the Shapiro-Wilk test. For normally distributed variables, the mean and SD are provided. For non-normally distributed variables, the median and IQR are presented.

| Characteristic                                            |                       | Baseline                     | Longitudinal                    |
|-----------------------------------------------------------|-----------------------|------------------------------|---------------------------------|
| Eyes of Patients                                          |                       | 150 eyes of 85 patients      | 89 eyes of 53 patients          |
| Age [years]                                               |                       | 77.9 [9.62]; 77.1 $\pm$ 7.1  | 78.1 [13.2]; 76.5 $\pm$ 7.4     |
| Follow-up visits [n]                                      |                       | NA                           | 1[1]; 0.9 $\pm$ 0.9             |
| Follow-up time[years]                                     |                       | NA                           | 1.00 [0.49]; 0.5 $\pm$ 0.49     |
| Sqrt.-transformed GA-progression rate [mm/year]           |                       | NA                           | 0.25 $\pm$ 0.19                 |
| Reading acuity (monocular) [logRAD]                       |                       | 0.90 [0.90]; 0.82 $\pm$ 0.47 | 0.80 [0.90]; 0.8 $\pm$ 0.47     |
| Reading speed (monocular) [wpm]                           |                       | 52.8[123.0]; 67.5 $\pm$ 69.7 | 53.0 [123.2]; 67.38 $\pm$ 62.06 |
| BCVA                                                      | [logMAR]              | 0.49 [0.80]; 0.59 $\pm$ 0.46 | 0.49 [0.80]; 0.60 $\pm$ 0.49    |
|                                                           | [Snellen fraction ft] | 20/60 [20/125]               | 20/60 [20/125]                  |
| LLVA                                                      | [logMAR]              | 1.00 [0.60]; 0.99 $\pm$ 0.46 | 1.09 [0.61.00 $\pm$ 0.46]       |
|                                                           | [Snellen fraction ft] | 20/200 [20/80]               | 20/250 [20/80]                  |
| Total GA size (sqrt-transformed) [sqrt(mm <sup>2</sup> )] |                       | 3.14 [1.98]; 3.0 $\pm$ 1.3   | 3.26 [1.98]; 3.2 $\pm$ 1.4      |
| Foveal Sparing                                            |                       | 57 eyes (38.0%)              | 36 eyes (40.4%)                 |
| Distance: GA to fovea [mm]                                |                       | 0.00 [0.09]; 0.1 $\pm$ 0.2   | 0.00 [0.14]; 0.11 $\pm$ 0.22    |
| GA area right of fovea [sqrt(mm <sup>2</sup> )]           |                       | 2.14 $\pm$ 1.01              | 2.25 [1.68]; 2.22 $\pm$ 1.05    |
| GA area left of fovea [sqrt(mm <sup>2</sup> )]            |                       | 2.13 $\pm$ 1.00              | 2.24 [1.48]; 2.19 $\pm$ 1.02    |
| ETDRS: Central subfield [sqrt(mm <sup>2</sup> )]          |                       | 0.86 [0.35]; 0.7 $\pm$ 0.3   | 0.85 [0.40]; 0.67 $\pm$ 0.29]   |
| ETDRS: Inner lower subfield [sqrt(mm <sup>2</sup> )]      |                       | 1.15 [0.36]; 0.96 $\pm$ 0.37 | 1.15 [0.36]; 0.96 $\pm$ 0.38    |
| ETDRS: Inner left subfield [sqrt(mm <sup>2</sup> )]       |                       | 1.15 [0.37]; 0.95 $\pm$ 0.38 | 1.13 [0.36]; 0.94 $\pm$ 0.38    |
| ETDRS: Inner right subfield [sqrt(mm <sup>2</sup> )]      |                       | 1.14 [0.47]; 0.93 $\pm$ 0.38 | 1.14 [0.48]; 0.93 $\pm$ 0.38    |
| ETDRS: Inner upper subfield [sqrt(mm <sup>2</sup> )]      |                       | 1.17 [0.45]; 0.94 $\pm$ 0.4  | 1.18 [0.40]; 0.96 $\pm$ 0.39    |
| ETDRS: Outer lower subfield [sqrt(mm <sup>2</sup> )]      |                       | 0.80 [1.13]; 0.83 $\pm$ 0.68 | 0.89 [1.28]; 0.85 $\pm$ 0.69    |
| ETDRS: Outer left subfield [sqrt(mm <sup>2</sup> )]       |                       | 0.83 [1.35]; 0.87 $\pm$ 0.69 | 0.85 [1.35]; 0.89 $\pm$ 0.70    |
| ETDRS: Outer right subfield [sqrt(mm <sup>2</sup> )]      |                       | 0.93 [1.33]; 0.9 $\pm$ 0.70  | 0.94 [1.36]; 0.95 $\pm$ 0.70    |

| Characteristic (cont.)                               | Baseline                | Longitudinal            |
|------------------------------------------------------|-------------------------|-------------------------|
| ETDRS: Outer upper subfield [sqrt(mm <sup>2</sup> )] | 0.97 [1.67]; 1.04 ±0.79 | 1.14 [1.68]; 0.96±0.39  |
| Distance: GA to PRL-initial [mm]                     | 0.11 [0.35]; 0.28±0.48  | 0.08 [0.35]; 0.29±0.54  |
| Distance: fovea to PRL-initial [mm]                  | 0.00 [0.00]; 1.11±1.02  | 0.00 [0.001]; 0.29±0.54 |
| GA right of PRL-initial [sqrt(mm <sup>2</sup> )]     | 2.38 ± 1.33             | 2.41 ±1.37              |
| GA left of PRL-initial [sqrt(mm <sup>2</sup> )]      | 1.55 [1.90]; 1.56±1.16  | 1.54 [1.79]; 1.64±1.21  |
| Distance: GA to PRL-final [mm]                       | 0.01 [0.03]; 0.25±0.47  | 0.00 [0.35]; 0.27±0.54  |
| Distance: fovea to PRL-final [mm]                    | 0.00 [0.001]; 1.28±0.8  | 0.00 [0.002]; 1.27±0.99 |
| GA right of PRL-final [sqrt(mm <sup>2</sup> )]       | 2.47 [1.77]; 2.45 ±1.36 | 2.49[1.87]; 2.46±1.42   |
| GA left of PRL-final [sqrt(mm <sup>2</sup> )]        | 1.39 [1.67]; 1.45±1.11  | 1.53 [1.83]; 1.56±1.17  |
| Distance: PRL-initial to PRL-final [mm]              | 0.00 [0.001]; 0.6±0.47  | 0.00 [0.001]; 0.55±0.36 |
| PRL-final nasal?                                     | 89 eyes (59.3%)         | 54 eyes (60.7%)         |

**eTable 2. Determinants reading performance (univariable cross-sectional analysis)**

The table shows the association of the different structural and functional biomarkers with reading acuity and speed. The first and fourth column denote the effect estimate with regard to change in reading acuity (logRAD) or speed (wpm) per unit change of the feature. The *t*-statistic (effect estimate divided by its standard error) can be compared across features as measure of variable importance. P-values were calculated using likelihood-ratio tests.

| Determinant                                                   | Reading Acuity:             |                         |             | Reading Speed:                |                         |         |
|---------------------------------------------------------------|-----------------------------|-------------------------|-------------|-------------------------------|-------------------------|---------|
|                                                               | Effect Estimate<br>[95% CI] | <i>t</i> -<br>statistic | P-<br>Value | Effect Estimate<br>[95% CI]   | <i>t</i> -<br>statistic | P-Value |
| Distance:<br>GA to fovea<br>[mm]                              | -1.22<br>[-1.56; -<br>0.88] | -7.1                    | <0.001      | 188.48<br>[137.91; 239.06]    | 7.45                    | <0.001  |
| ETDRS:<br>Central subfield<br>[sqrt(mm <sup>2</sup> )]        | 1.2<br>[0.98; 1.42]         | 10.87                   | <0.001      | -176.99<br>[-210.50; -143.49] | -10.56                  | <0.001  |
| ETDRS:<br>Inner lower<br>subfield<br>[sqrt(mm <sup>2</sup> )] | 0.64<br>[0.46; 0.82]        | 7.11                    | <0.001      | -107.07<br>[-132.90; -81.25]  | -8.29                   | <0.001  |
| ETDRS:<br>Inner left<br>subfield<br>[sqrt(mm <sup>2</sup> )]  | 0.59<br>[0.42; 0.76]        | 6.64                    | <0.001      | -93.05<br>[-118.92; -67.18]   | -7.19                   | <0.001  |
| ETDRS:<br>Inner right<br>subfield<br>[sqrt(mm <sup>2</sup> )] | 0.68<br>[0.51; 0.84]        | 8.11                    | <0.001      | -112.73<br>[-136.27; -89.20]  | -9.58                   | <0.001  |
| ETDRS:<br>Inner upper<br>subfield<br>[sqrt(mm <sup>2</sup> )] | 0.58<br>[0.40; 0.75]        | 6.62                    | <0.001      | -97.77<br>[-122.22; -73.32]   | -8                      | <0.001  |
| ETDRS:<br>Outer lower<br>subfield<br>[sqrt(mm <sup>2</sup> )] | 0.26<br>[0.15; 0.38]        | 4.61                    | <0.001      | -43.31<br>[-59.92; -26.69]    | -5.21                   | <0.001  |
| ETDRS:<br>Outer left<br>subfield<br>[sqrt(mm <sup>2</sup> )]  | 0.16<br>[0.05; 0.27]        | 2.96                    | <0.05       | -27.42<br>[-43.53; -11.31]    | -3.4                    | <0.001  |
| ETDRS:<br>Outer right<br>subfield<br>[sqrt(mm <sup>2</sup> )] | 0.23<br>[0.13; 0.34]        | 4.48                    | <0.001      | -43.23<br>[-58.29; -28.17]    | -5.74                   | <0.001  |
| ETDRS:<br>Outer upper<br>subfield<br>[sqrt(mm <sup>2</sup> )] | 0.14<br>[0.04; 0.25]        | 2.82                    | <0.05       | -23.87<br>[-38.65; -9.09]     | -3.23                   | <0.05   |
| GA right of<br>fovea<br>[sqrt(mm <sup>2</sup> )]              | 0.21<br>[0.14; 0.29]        | 5.94                    | <0.001      | -37.51<br>[-47.68; -27.35]    | -7.38                   | <0.001  |
| GA left of fovea<br>[sqrt(mm <sup>2</sup> )]                  | 0.18<br>[0.11; 0.25]        | 4.91                    | <0.001      | -28.78<br>[-39.43; -18.14]    | -5.41                   | <0.001  |

|                                        |                      |      |        |                           |       |        |
|----------------------------------------|----------------------|------|--------|---------------------------|-------|--------|
| Total GA size [sqrt(mm <sup>2</sup> )] | 0.15<br>[0.09; 0.21] | 5.39 | <0.001 | -25.7<br>[-17.58; -33.83] | -6.33 | <0.001 |
|----------------------------------------|----------------------|------|--------|---------------------------|-------|--------|

| Determinant (cont.)                              | Reading Acuity:         |             |         | Reading Speed:               |             |         |
|--------------------------------------------------|-------------------------|-------------|---------|------------------------------|-------------|---------|
|                                                  | Effect Estimate         | t-statistic | P-Value | Effect Estimate              | t-statistic | P-Value |
| Distance: GA to PRL-initial [mm]                 | -0.04<br>[-0.19; 0.12]  | -0.46       | 0.65    | 7.67<br>[-15.65; 31.00]      | 0.66        | 0.51    |
| GA right of PRL-initial [sqrt(mm <sup>2</sup> )] | 0.17<br>[0.12; 0.23]    | 6.6         | <0.001  | -26.83<br>[-34.57; -19.09]   | -6.94       | <0.001  |
| GA left of PRL-initial [sqrt(mm <sup>2</sup> )]  | 0.006<br>[-0.06; 0.07]  | 0.17        | 0.86    | -4.49<br>[-14.57; 5.57]      | -0.89       | 0.37    |
| Distance: fovea to PRL-initial [mm]              | 0.19<br>[0.12; 0.26]    | 5.67        | <0.001  | -26.34<br>[-36.76; -15.91]   | -5.05       | <0.001  |
| Distance: GA to PRL-final [mm]                   | -0.07<br>[-0.23; 0.10]  | -0.83       | 0.41    | 13.59<br>[-10.91; 38.10]     | 1.11        | 0.27    |
| GA right of PRL-final [sqrt(mm <sup>2</sup> )]   | 0.16<br>[0.11; 0.21]    | 5.96        | <0.001  | -25.03<br>[-32.77; -17.29]   | -6.47       | <0.001  |
| GA left of PRL-final [sqrt(mm <sup>2</sup> )]    | 0.03<br>[0.004; 0.1]    | 0.73        | 0.47    | -7<br>[-17.48; 3.47]         | -1.34       | 0.18    |
| Distance: fovea to PRL-final                     | 0.18<br>[0.1; 0.26]     | 4.44        | <0.001  | -24.61<br>[-36.88; -12.34]   | -4.01       | <0.001  |
| Distance: PRL-initial to PRL-final [mm]          | 0.12<br>[-0.3; 0.29]    | 1.61        | 0.11    | -30.61<br>[53.60; -7.61]     | -2.66       | <0.05   |
| PRL position [nasal / peripheral]                | -0.22<br>[-0.35; -0.08] | -3.13       | <0.05   | 30.28<br>[9.34; 51.23]       | 2.89        | <0.05   |
| LLVA [logMAR]                                    | 0.62<br>[0.76; 0.47]    | 8.29        | <0.001  | -105.49<br>[-125.73; -85.25] | -10.42      | <0.001  |
| Age [years]                                      | 0.004<br>[-0.008; 0.02] | 0.64        | 0.53    | -1.1<br>[-2.90; 0.70]        | -1.23       | 0.24    |
| BCVA [logMAR]                                    | 0.82<br>[0.73; 0.92]    | 17.24       | <0.001  | -110.37<br>[-127.15; -93.58] | -13.15      | <0.001  |
| Foveal Sparing                                   | -0.67<br>[-0.78; -0.55] | -11.18      | <0.001  | 87.74<br>[67.83; 107.65]     | 8.81        | <0.001  |

## eFigure 1. Correlation among candidate features

The heatmap shows the Spearman correlation among all of the candidate features. The correlation is color-labelled (red – positive correlation; no color – no correlation; blue – negative correlation). Note that strong correlations in value indicate multicollinearity.

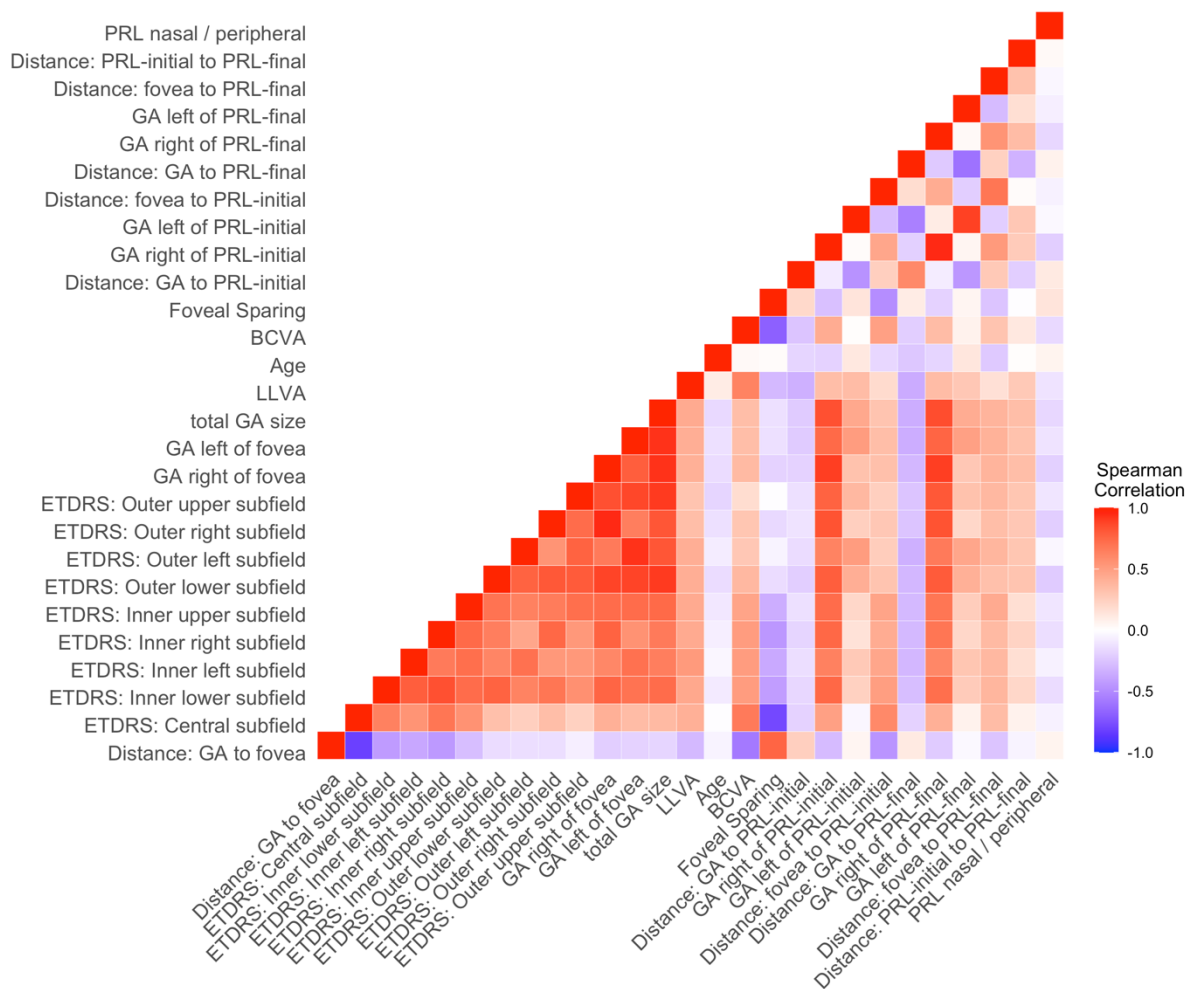

## eFigure 2. Backward-selected Linear Model: Feature Importance at Baseline

The variable importance was measured by the t-statistic for the univariable and multivariable analysis each for the reading speed and reading acuity. (red: microperimetry related; light blue: conventional imaging; dark blue: functional).

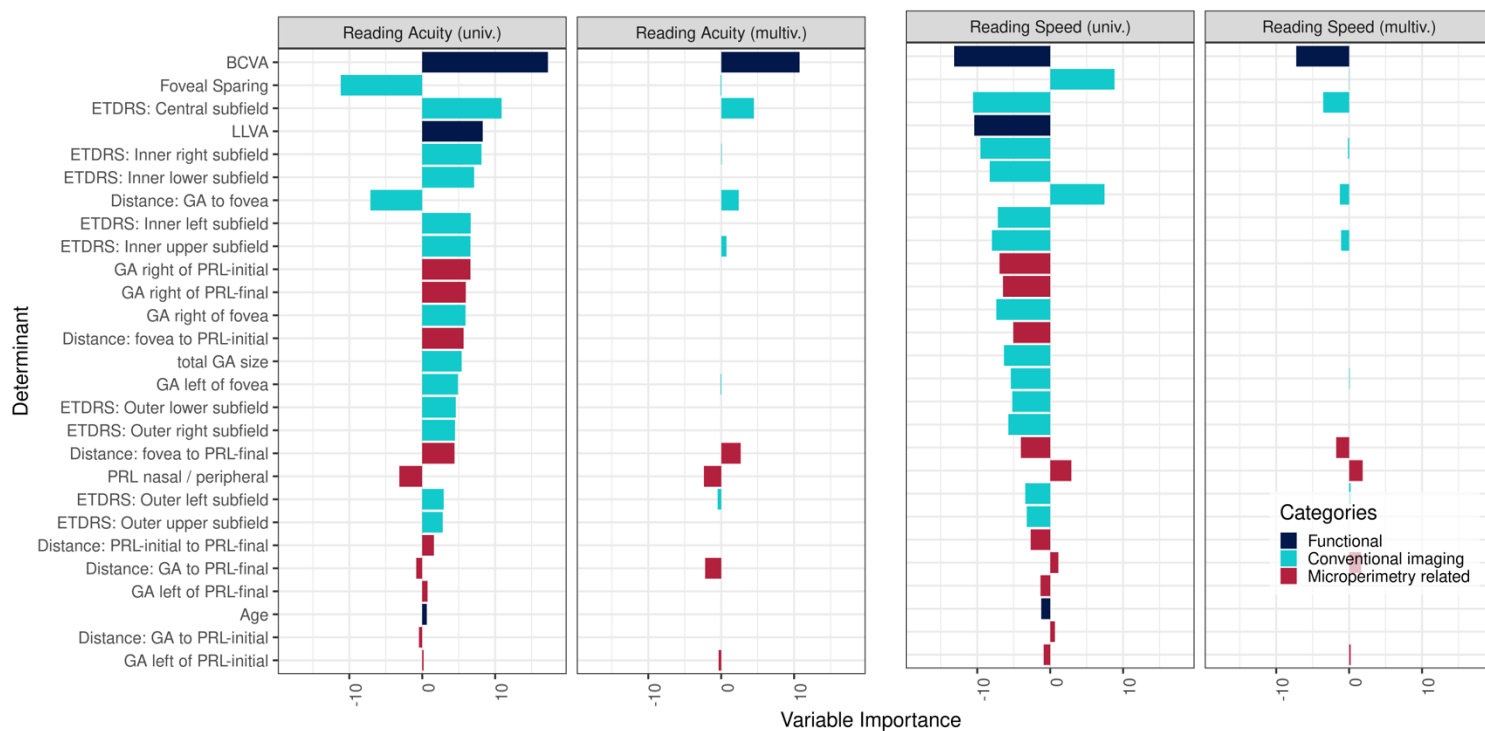

### eFigure 3. Backward-selected LM: Longitudinal Feature Importance

The variable importance was measured by the cross-validated t-statistics each for the reading speed and reading acuity (red: microperimetry related; light blue: conventional imaging; dark blue: functional). Note the drastically difference of selected variables compared to the cross-sectional model, which points to the instability of backward-selection due the presence of strong multicollinearities between our variables.

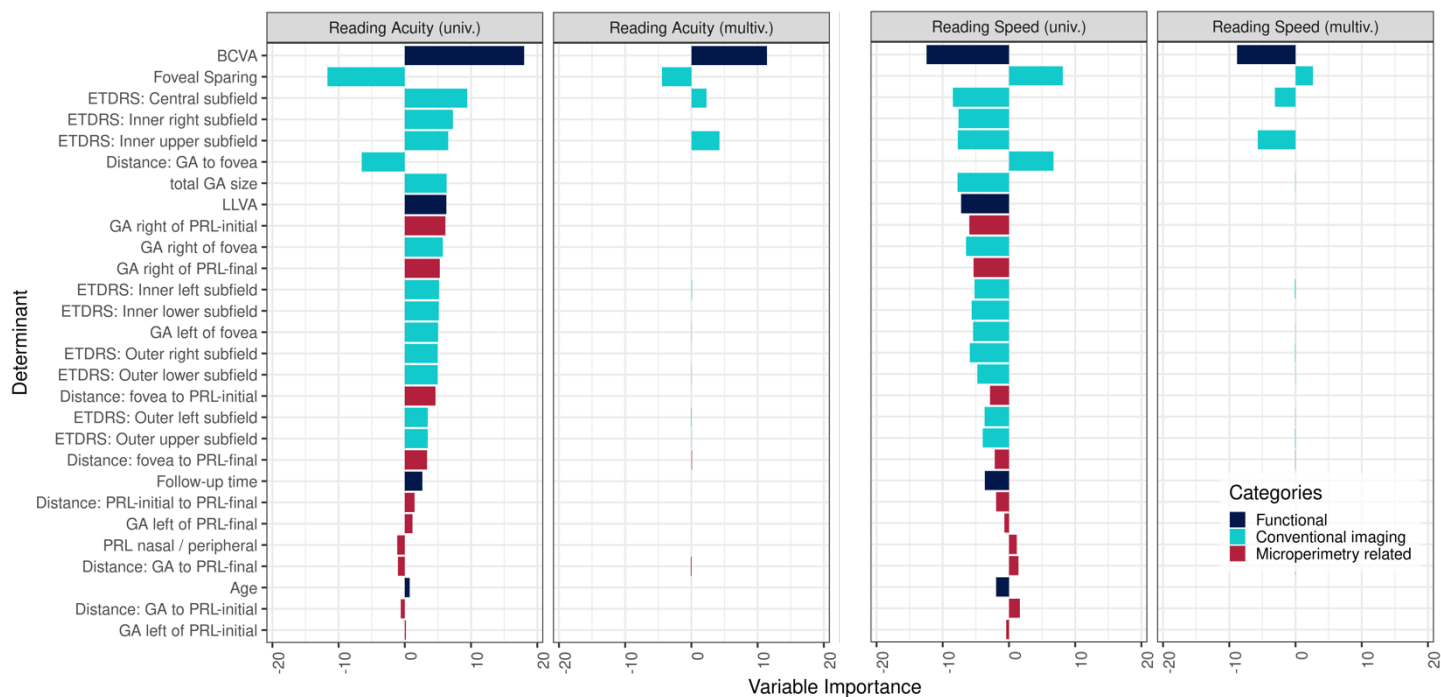



**eFigure 4. Model accuracy**

The plot shows the mean absolute error (MAE) of the cross-validated multivariable *LASSO* regression model compared to a random forest (RF) model, that was trained on the same dataset for (A) reading acuity and (B) reading speed. Since the MAE is comparable in both models, preference was given to *LASSO* regression in consideration of interpretability.

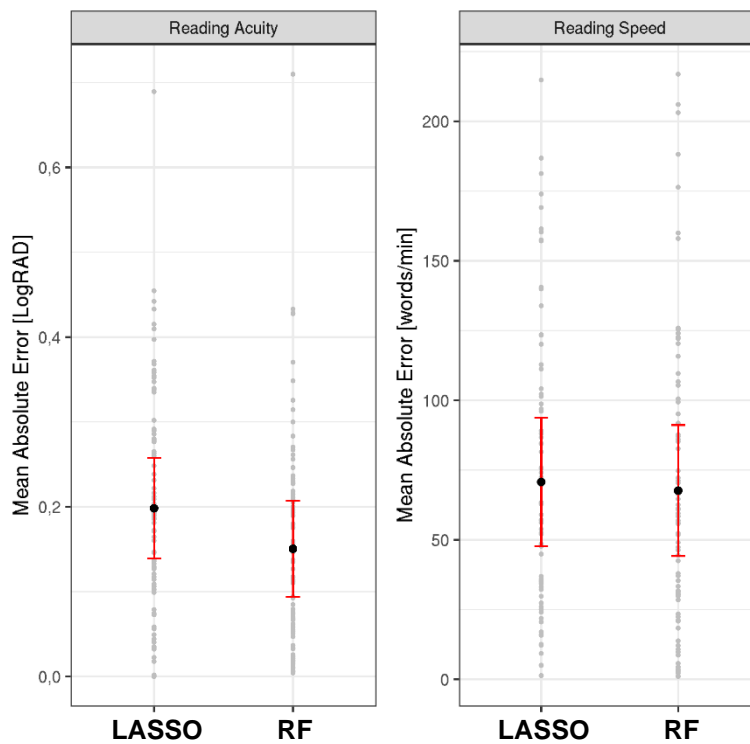

Supplement: jamaophthalmol-e213826-s001.pdf [file jamaophthalmol-e213826-s001.pdf]
